# Supplementary material for: Specific Engineered G Protein Coupling to Histamine Receptors Revealed from Cellular Assay Experiments and Accelerated Molecular Dynamics Simulations
Source: MDPI journal article supplement (doi:10.3390/ijms221810047), 2021-09-17
Supplement: s1 [file s1]

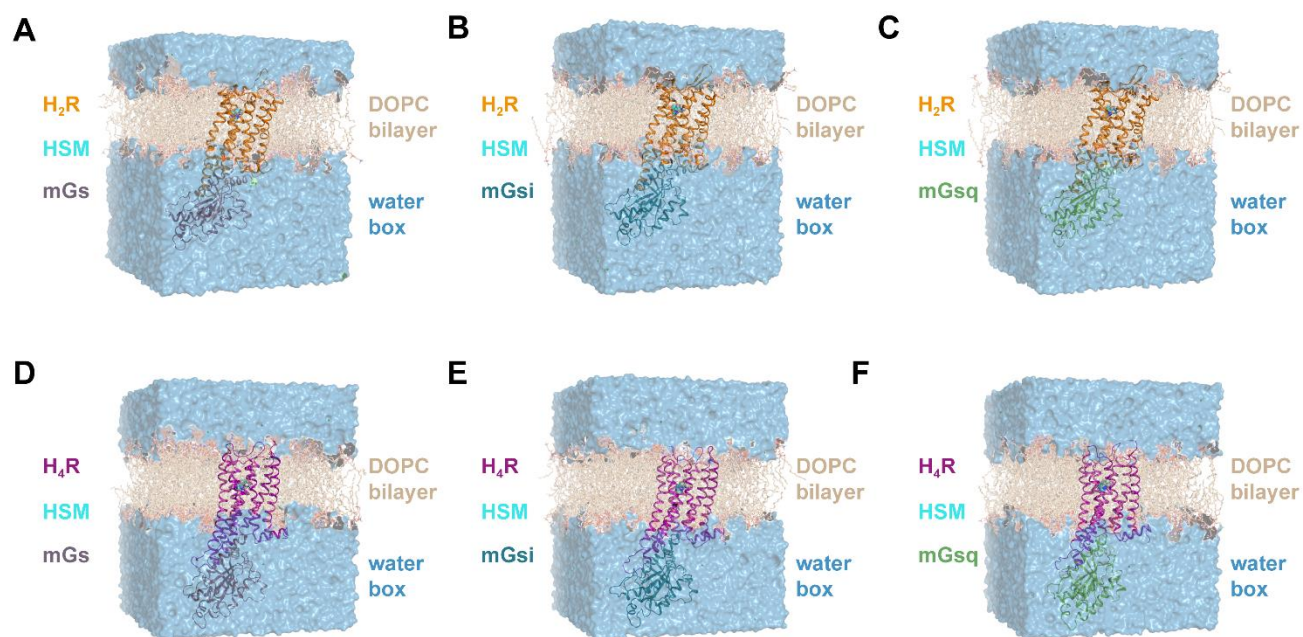

**Figure S1.** Computational model of GaMD simulation systems containing the H<sub>2</sub>R in complex with A) mGs, B) mGsi and C) mGsq as well as the H<sub>4</sub>R in complex with D) mGs, E) mGsi and F) mGsq. The histamine (HSM)-bound receptors complexed by mini-G proteins were embedded into a dioleoylphosphatidylcholine (DOPC) bilayer and solvated in a TIP3 water box with Cl<sup>-</sup> as counter ions.

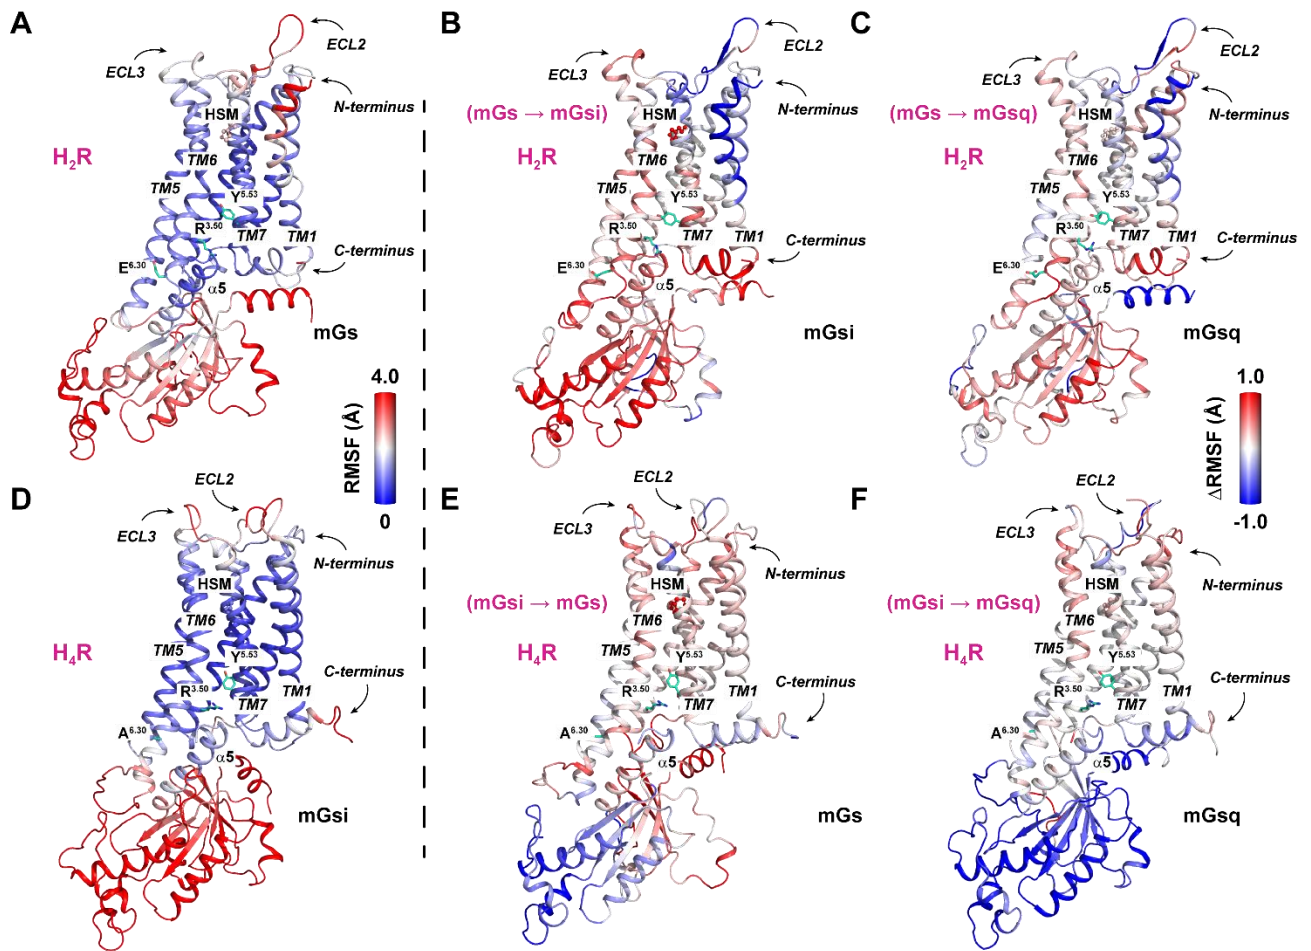

**Figure S2.** Comparison of the structural flexibility in H<sub>2</sub>R and H<sub>4</sub>R complexes with mini-G proteins. A) Overall structural flexibility (RMSF) of the H<sub>2</sub>R-mGs complex and changes in structural flexibility ( $\Delta$ RMSF) in the H<sub>2</sub>R complexes, when mGs was exchanged by mGsi (B) or mGsqs (C). D) Overall structural flexibility (RMSF) of the H<sub>4</sub>R-mGsi complex and changes in structural flexibility ( $\Delta$ RMSF) in the H<sub>4</sub>R complexes, when mGsi was exchanged by mGs (E) or mGsqs (F). For RMSFs, a color scale of 0.0 Å (blue) to 4.0 Å (red) was used. In case of  $\Delta$ RMSF, the color scale ranged from -1.0 Å (blue) to 1.0 Å (red). ( $\Delta$ )RMSF values were assigned to the starting structure of each system.

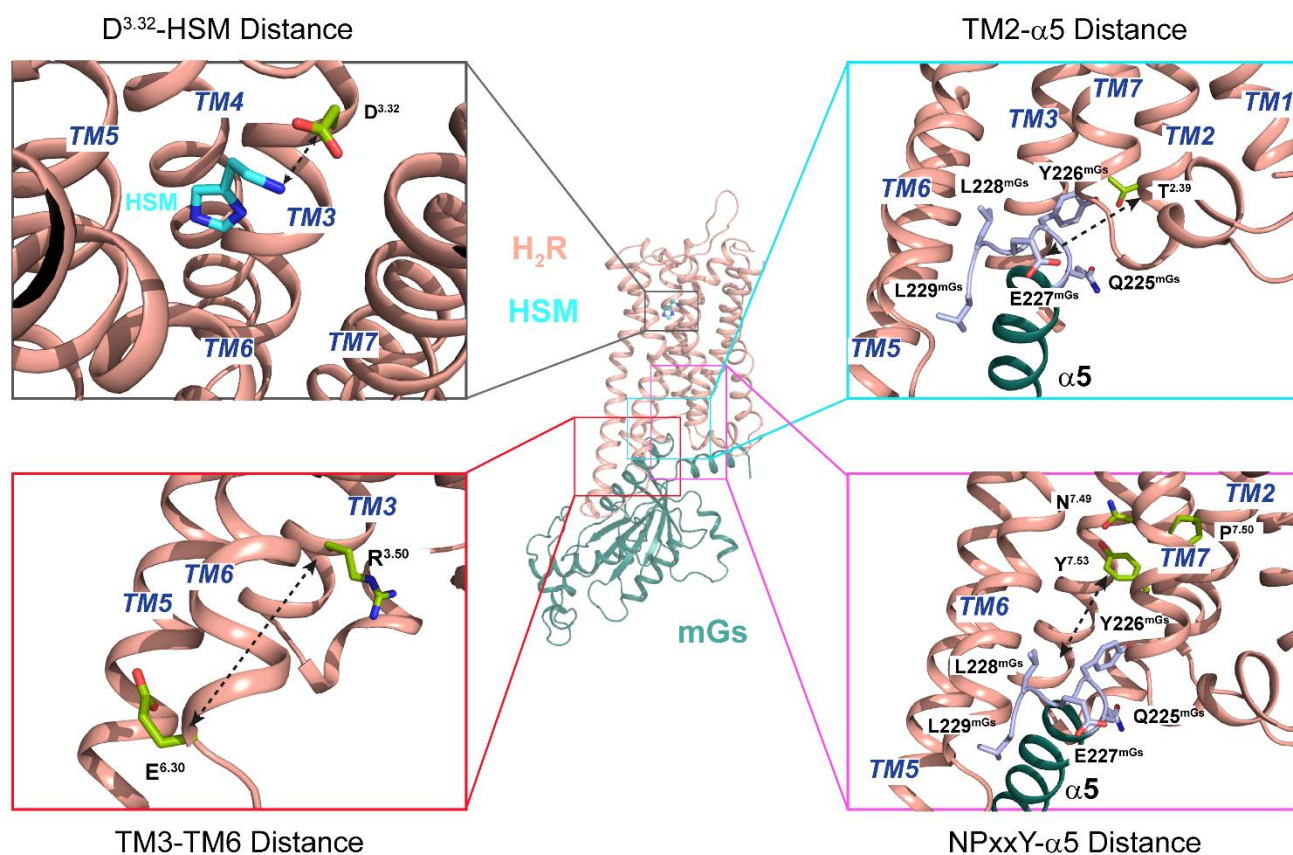

**Figure S3.** Schematic illustration of the reaction coordinates used for energetic reweighting exemplarily shown for the H<sub>2</sub>R in complex with mGs. The distance between D<sup>3.32</sup> and histamine (HSM) was calculated using the C<sub>γ</sub> atom of D<sup>3.32</sup> and N<sub>α</sub> of histamine. The distance between TM3 and TM6 was assessed using the C<sub>α</sub>, C and N atoms of residues R<sup>3.50</sup> and E<sup>6.30</sup>. The distance between the NPxxY motif and α5 helix of mGs was calculated using the center of mass of the NPxxY motif (N<sup>7.49</sup>, P<sup>7.50</sup> and Y<sup>7.53</sup>) and the last five residues of mGs α5 helix (Q225, Y226, E227, L228 and L229). The distance between TM2 of the H<sub>2</sub>R and the α5 helix of mGs was determined using the C<sub>α</sub>, C and N atoms of T<sup>2.39</sup> and the geometric center of the last five residues of mGs α5 helix (Q225, Y226, E227, L228 and L229).

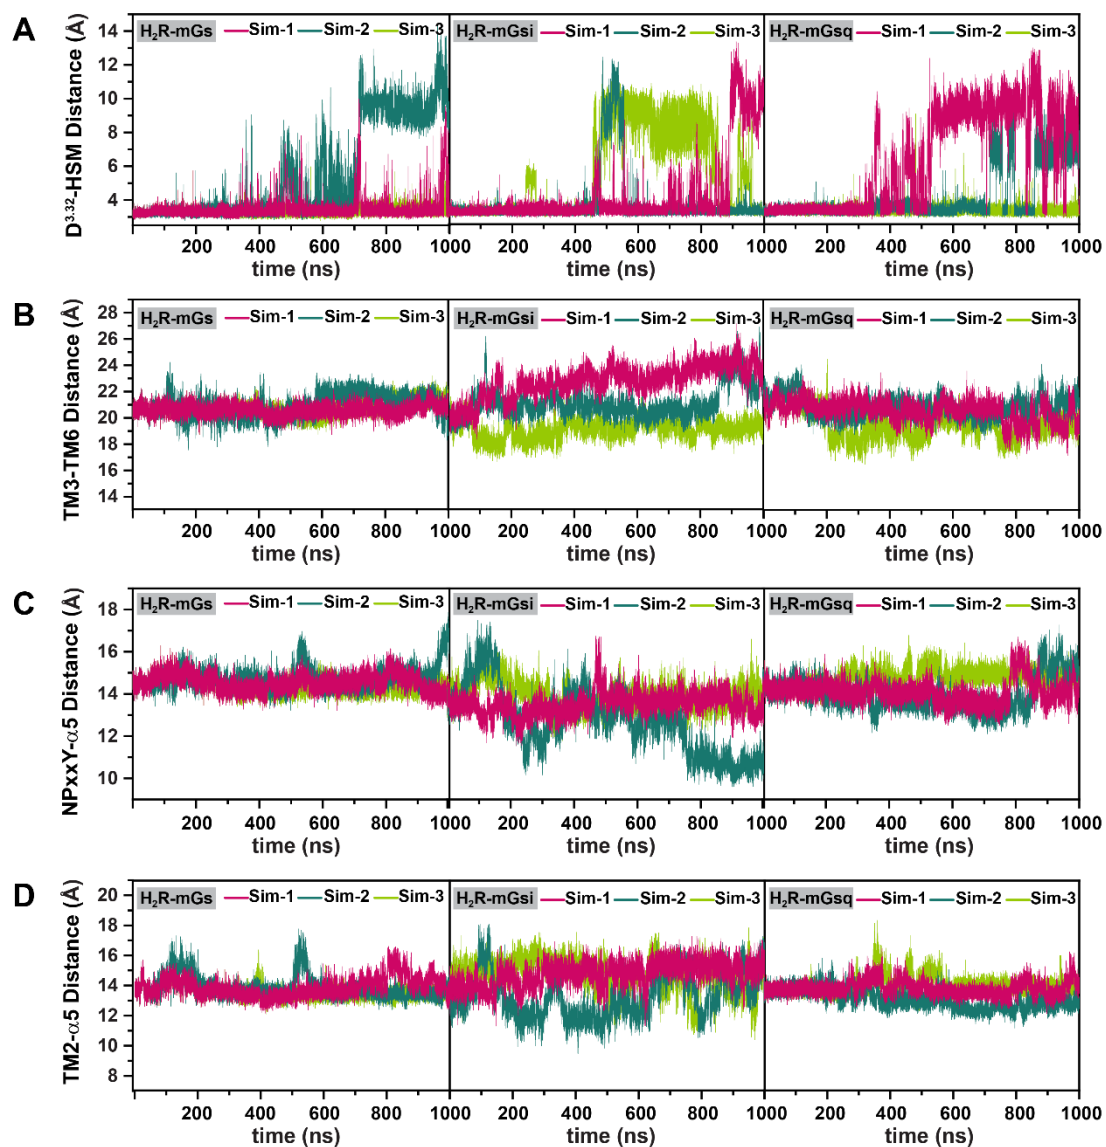

**Figure S4.** Time courses of the reaction coordinates in H<sub>2</sub>R systems (H<sub>2</sub>R-mGs, H<sub>2</sub>R-mGsi and H<sub>2</sub>R-mGsq) used for energetic reweighting. A) Distance between D<sup>3.32</sup> and histamine (HSM) using the CG atom of D<sup>3.32</sup> and N $\alpha$  of histamine. B) Distance between TM3 and TM6 of the H<sub>2</sub>R. The C $\alpha$ , C and N atoms of residues R<sup>3.50</sup> and E<sup>6.30</sup> were used to calculate the distance. C) Distance between the NPxxY motif and  $\alpha$ 5 helix of the respective mini-G protein. The distance was calculated using the center of mass of the NPxxY motif and the last five residues of  $\alpha$ 5 helix. D) Distance between TM2 of the H<sub>2</sub>R and the  $\alpha$ 5 helix of the respective mini-G protein. To calculate the distance, the C $\alpha$ , C and N atoms of T<sup>2.39</sup> and the geometric center of the last five residues of  $\alpha$ 5 were used.



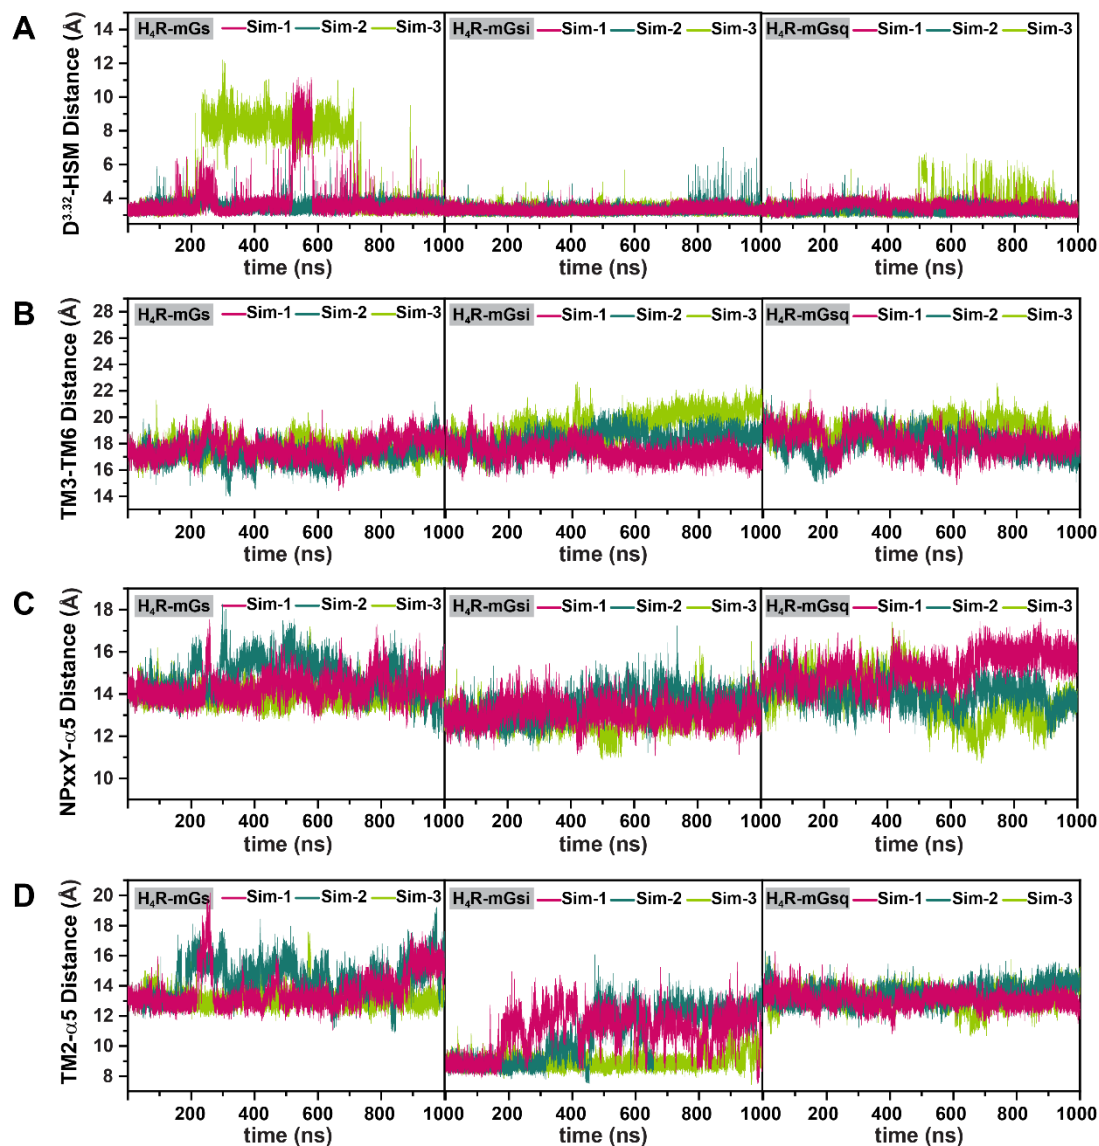

**Figure S5.** Time courses of the reaction coordinates in H4R systems (H4R-mGs, H4R-mGsi and H4R-mGsq) used for energetic reweighting. A) Distance between D<sup>3.32</sup> and histamine (HSM) using the CG atom of D<sup>3.32</sup> and N $\alpha$  of histamine. B) Distance between TM3 and TM6 of the H4R. The C $\alpha$ , C and N atoms of residues R<sup>3.50</sup> and A<sup>6.30</sup> were used to calculate the distance. C) Distance between the NPxxY motif and  $\alpha$ 5 helix of the respective mini-G protein. The distance was calculated using the center of mass of the NPxxY motif and the last five residues of  $\alpha$ 5 helix. D) Distance between TM2 of the H4R and the  $\alpha$ 5 helix of the respective mini-G protein. To calculate the distance, the C $\alpha$ , C and N atoms of S<sup>2.39</sup> and the geometric center of the last five residues of  $\alpha$ 5 were used.

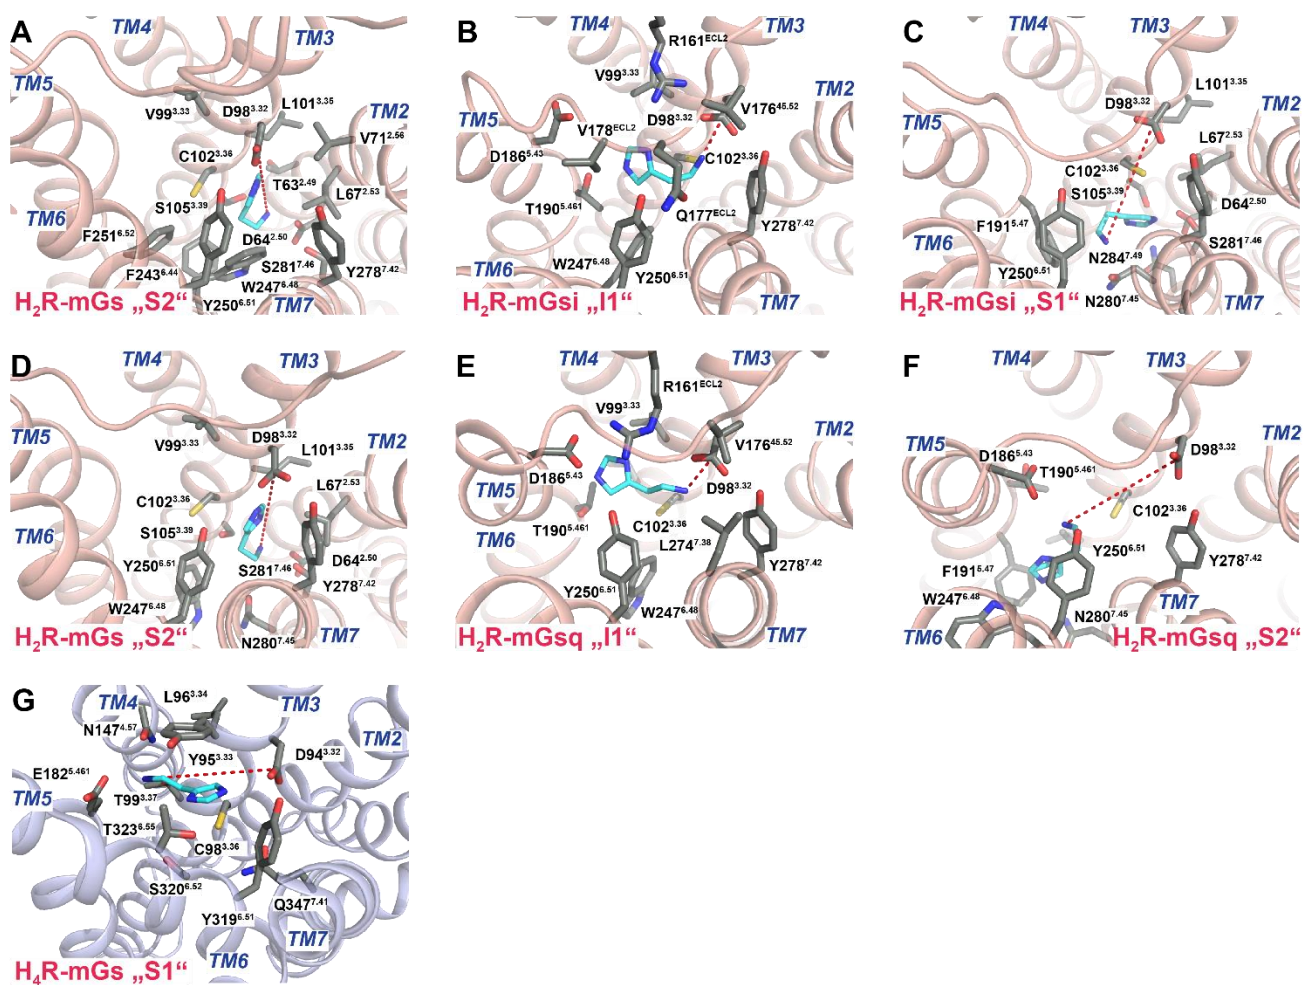

**Figure S6.** Binding modes of histamine (light blue) within the orthosteric binding pocket of the  $H_2R$  (salmon) and the  $H_4R$  (purple). Structures representing the separated histamine state “S2” in  $H_2R$ -mGs (A), the intermediately bound state “I1” (B) and the separated histamine states “S1” (C) and “S2” (D) in  $H_2R$ -mGsi, the intermediately bound state “I1” (E) and the separated histamine states “S2” (F) in  $H_2R$ -mGsq complexes, as well as the separated histamine state “S1” in the  $H_4R$ -mGs complex (G) are shown. Contact residues within 4 Å of the ligand are highlighted as sticks (dark grey). The histamine-D<sup>3.32</sup> distance is highlighted with a red, dashed line.

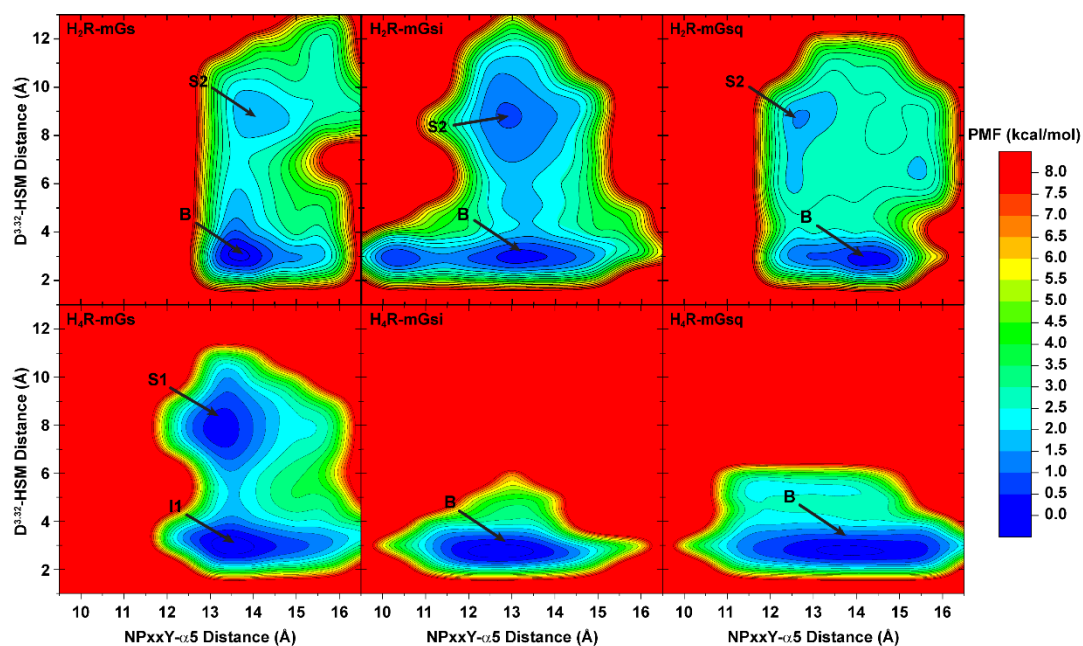

**Figure S7.** Free energy profiles of GaMD simulations with complexes of either the H<sub>2</sub>R or the H<sub>4</sub>R in combination with mGs, mGsi or mGsq. Distances (Å) between D<sup>3.32</sup> (CG atom) and the amino group of histamine (N $\alpha$  atom) as well as of the NPxxY -  $\alpha$ 5 helix distance were used as reaction coordinates. The NPxxY distance was determined using the center-of-mass (COM) distance between the receptors' NPxxY motif and the last 5 residues of the mG  $\alpha$ 5 helix. For each system, three independent GaMD simulations were used for analysis. (Labels: "B" indicates representative low energy wells of fully active receptors bound to histamine, "I1" indicates low energy wells of intermediate receptor conformation bound to histamine. "S1" and "S2" indicate low energy wells containing conformations with histamine separated from D<sup>3.32</sup>, cf. Figure 1).

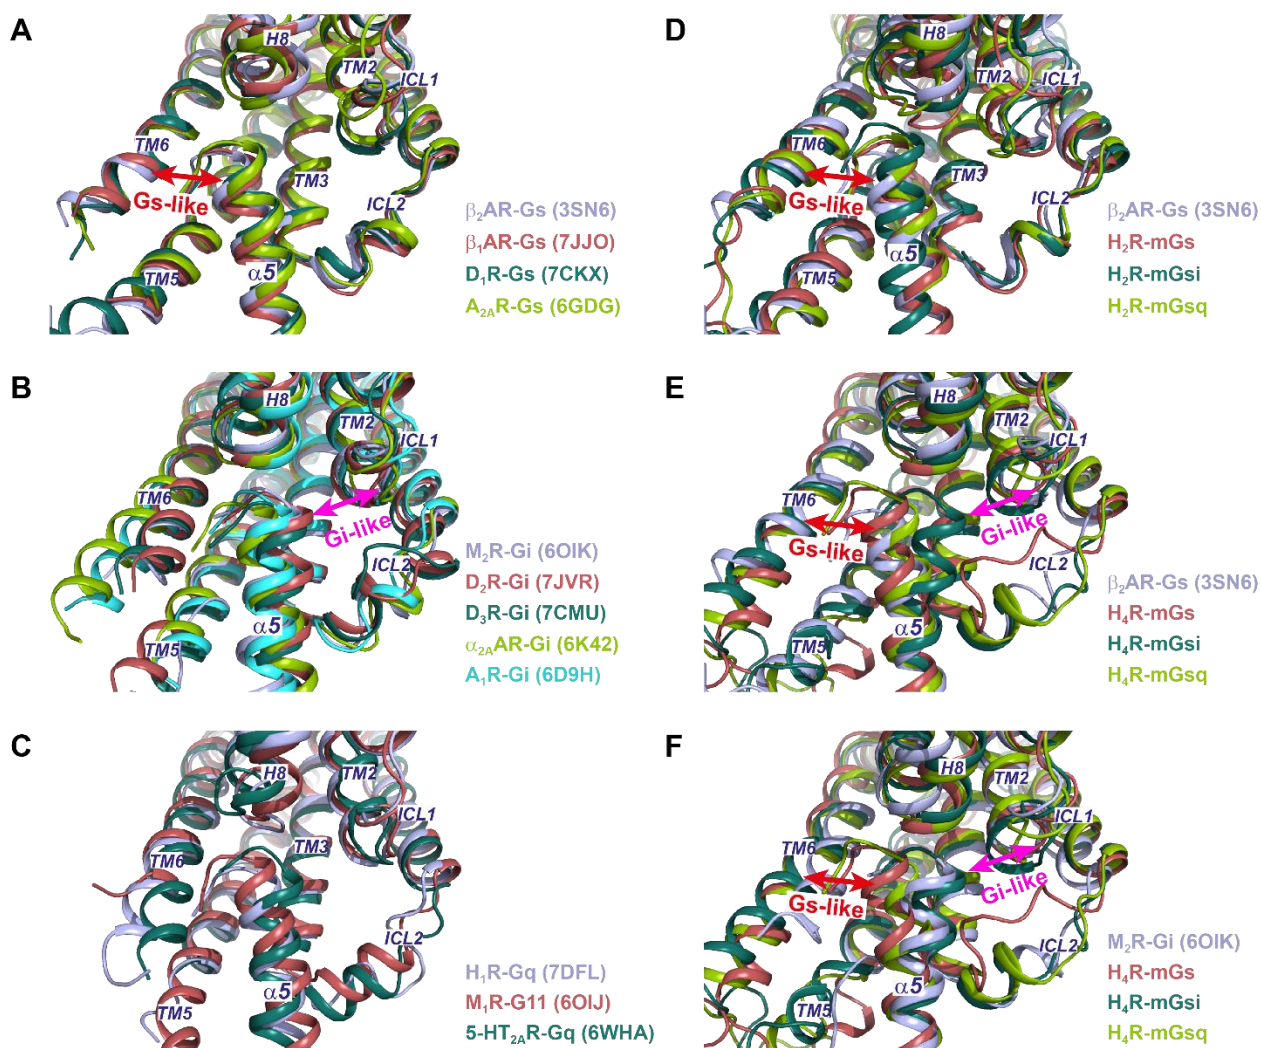

**Figure S8.** Comparison of the  $\alpha 5$  helix orientation at the GPCR- G protein interface. Cytoplasmic view of the  $\alpha 5$  helix orientation of exemplary A) GPCR-Gs complexes ( $\beta_2$ AR, pdb-id.: 3SN6, purple;  $\beta_1$ AR, pdb-id.: 7JJO, light red; D<sub>1</sub>R, pdb-id.: 7CKX, dark green; A<sub>2A</sub>R, pdb-id.: 6GDG, light green), B) GPCR-Gi complexes (M<sub>2</sub>R, pdb-id.: 6OIK, purple; D<sub>2</sub>R, pdb-id.: 7JVR, light red; D<sub>3</sub>R, pdb-id.: 7CMU, dark green;  $\alpha_{2A}$ AR, pdb-id.: 6K42, light green; A<sub>1</sub>R, pdb-id.: 6DH9, blue) and GPCR-Gq complexes (H<sub>1</sub>R, pdb-id.: 7DFL, purple; M<sub>1</sub>R, pdb-id.: 6OIJ, light red; 5-HT<sub>2A</sub>R, pdb-id.: 6WHA, dark green). D) Comparison of the  $\alpha 5$  helix orientation in the  $\beta_2$ AR-Gs complex (purple) and the representative structures of low energy wells containing the fully active receptors bound to histamine (“B” states, cf. Fig. 1) of the H<sub>2</sub>R-mGs (light red), H<sub>2</sub>R-mGsi (dark green) and H<sub>2</sub>R-mGsqs (light green) complexes obtained in GaMD simulations. The  $\alpha 5$  helix orientation in representative histamine bound structures of H<sub>4</sub>R-mGs (“I1” state, light red), H<sub>4</sub>R-mGsi (“B” state, dark green) and H<sub>4</sub>R-mGsqs (“B” state, light green) complexes are compared to the E)  $\beta_2$ AR-Gs (purple) and F) M<sub>2</sub>R-Gi (purple) complexes. The Gs-like  $\alpha 5$  orientation towards TM6 is highlighted in red and the Gi-like  $\alpha 5$  orientation towards TM2 in pink.



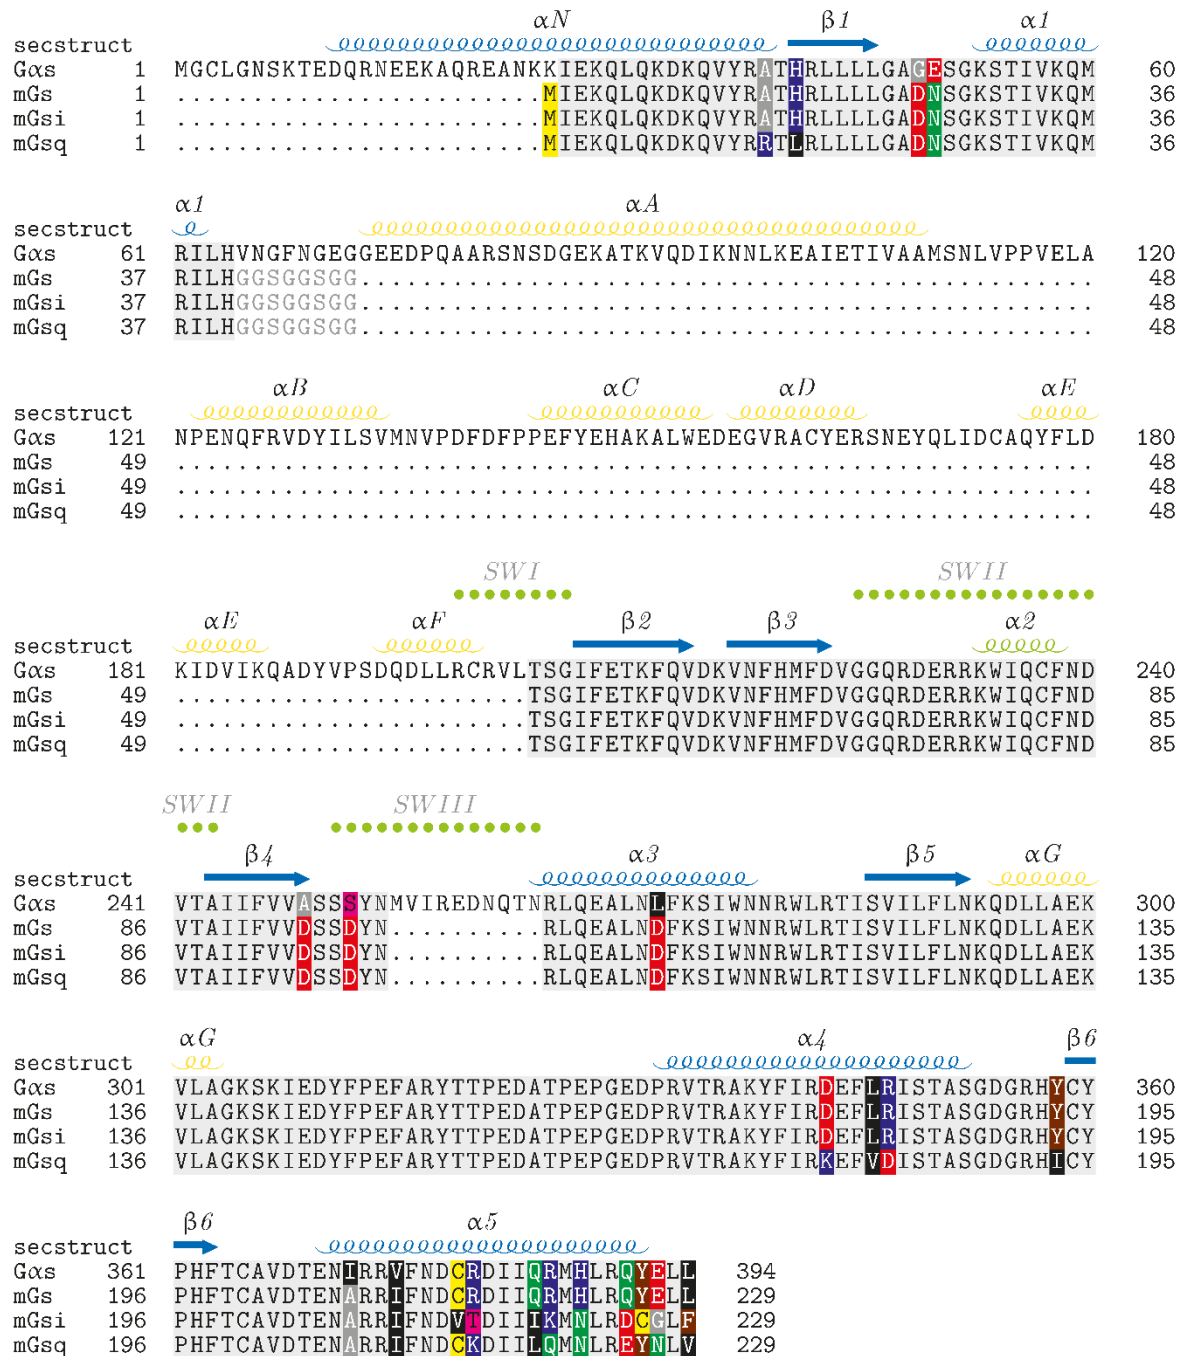

**Figure S9.** Sequence alignment of the Gas subunit and the utilized mini-G proteins mGs, mGsi and mGsq. Secondary structure elements of Gas, such as α helices and β sheets, are highlighted as loops and arrows, respectively, in blue (GTPase domain) and yellow (helical domain). The switch regions (SWI, SWII and SWIII) are labeled in green. Identical residues of the sequences are colored in light grey. Sequence differences are highlighted due to the chemical properties of the residue functional groups (acidic: red, aliphatic: black, aliphatic (small): grey, amide: green, aromatic: brown, basic: blue, hydroxyl: pink, imino: orange, sulfur: yellow). Residues only present in Gas are not shaded.
